# Supplementary material for: Determination of Morpho-Physiological Traits for Assessing Drought Tolerance in Sugarcane
Source: MDPI journal article supplement (doi:10.3390/plants13081072), 2024-04-11

**Figure S1.** The difference in cane yield and the percentage reduction in yield among 40 sugarcane genotypes under both non-stressed and drought-stressed conditions in field environments [54]. Bars with different letters, as well as A and B, indicate a significant difference determined by the least significant difference (LSD) test at  $p < 0.05$ .

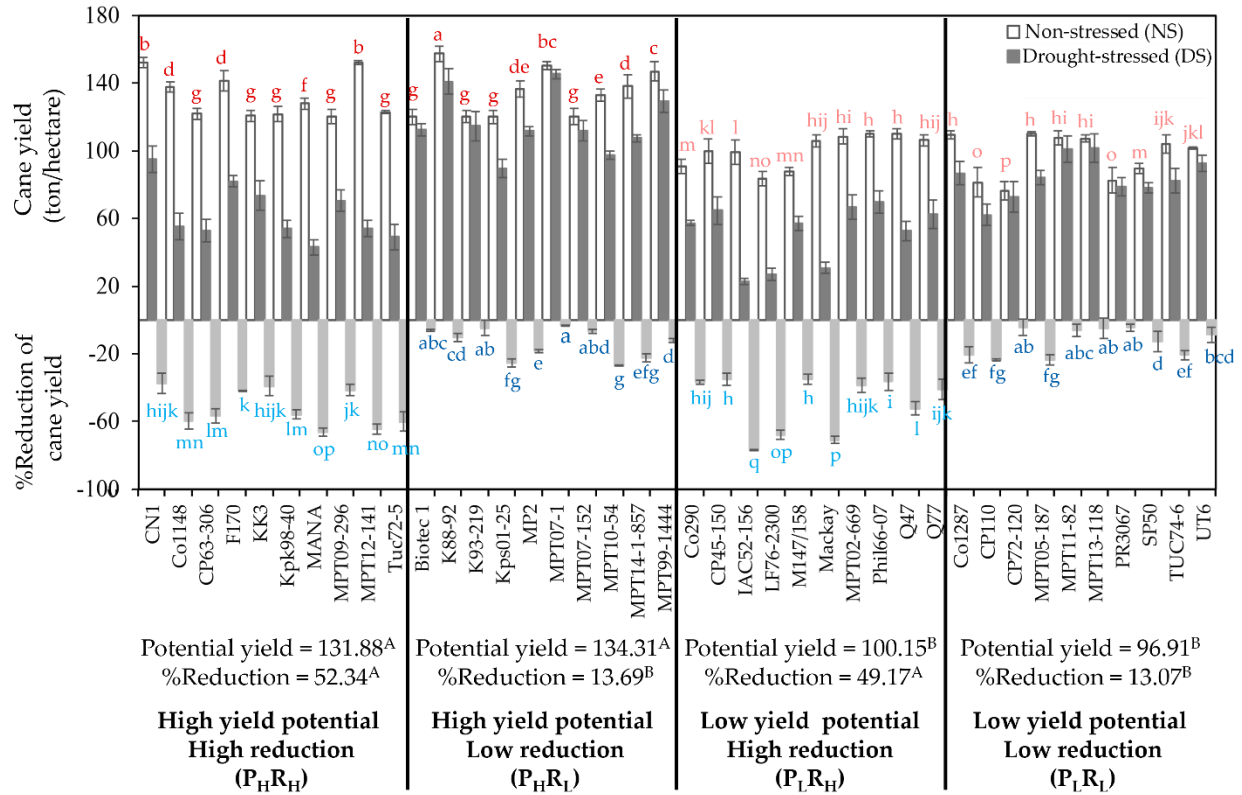

**Figure S2. (a)** Soil moisture content (%) at the midpoint of soil depths, **(b)** maximum temperature (Tmax, °C), minimum temperature (Tmin, °C), and relative humidity (RH, %) during 91-118 days after planting under greenhouse environments. Asterisks (\*) indicate significant variations between treatments at the 0.05 probability level, while "NS" denotes non-significant variations.

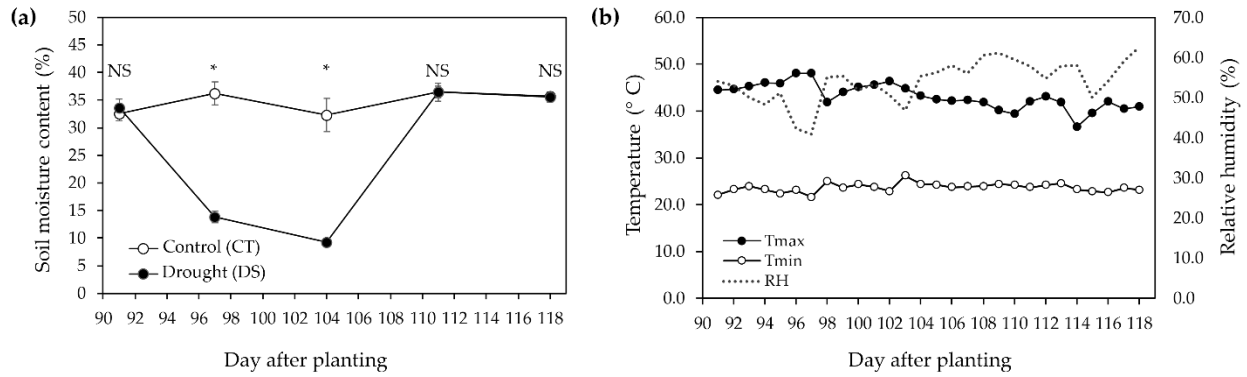

**Figure S3.** The black circle, white circle, black triangle, and white triangle on the boxes indicate the distribution of sugarcane genotypes in the groups of high yield potential and high reduction ( $P_H R_H$ ), high yield potential and low reduction ( $P_H R_L$ ), low yield potential and high reduction ( $P_L R_H$ ), and low yield potential and low reduction ( $P_L R_L$ ), respectively. HGR = height growth rate; SGR = shoot growth rate;  $F_v/F_m$  = the chlorophyll fluorescence ratio; SPAD = estimated chlorophyll content using SPAD units; RWC = leaf relative water content, LR = leaf rolling score; LD = leaf drying score; DR = drought recovery score

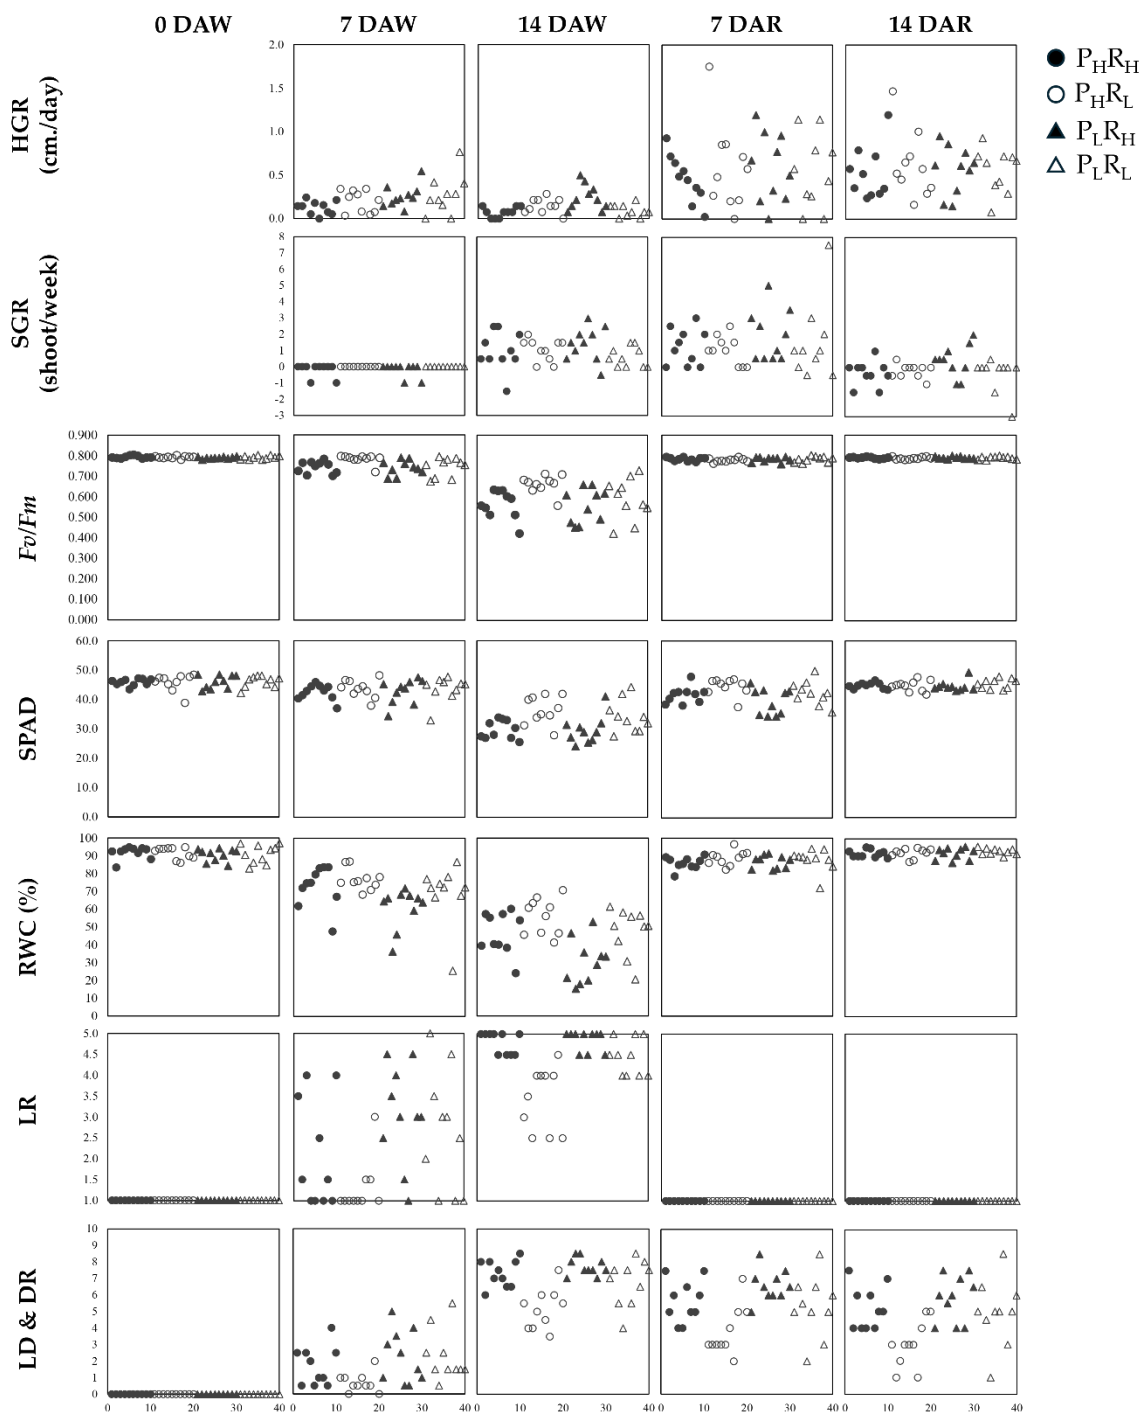

Supplement: s1 [file s1]
